# Supplementary material for: Combined transcriptome and metabolome analysis provides insights in germination and seedling morphogenesis in aging rice (Oryza sativa L.) seeds treated with indole-3-butyrate
Source: Research Square preprint supplement (doi:10.21203/rs.3.rs-7433438/v1), 2025-09-11
Supplement: Supplementary file 1 [file 0992d157a8e6faf6f6506a62.xlsx]

## Sheet: Sheet1
Table S2. Basic information about transcriptomic data
Sample	Raw Reads	Clean Reads	Clean Base(G)	Error Rate(%)	Q20(%)	Q30(%)	GC Content(%)
2016CK-1	54547606	50245402	7.54	0.02	98.29	95.07	54.47
2016CK-2	69602702	66538354	9.98	0.03	97.96	94.27	54.32
2016CK-3	60021658	56275340	8.44	0.02	98.1	94.62	54.35
2016IBAK-1	52667718	49506138	7.43	0.03	97.85	94.11	53.56
2016IBAK-2	53869134	51064860	7.66	0.03	97.88	94.1	53.38
2016IBAK-3	60593786	57800764	8.67	0.03	97.84	94.07	53.6
2021CK-1	56949788	53660930	8.05	0.02	98.04	94.55	54.4
2021CK-2	56252236	53798322	8.07	0.03	97.82	94.06	54.05
2021CK-3	68531160	63585350	9.54	0.02	98.32	95.21	54.59
2021IBAK-1	56861718	52993538	7.95	0.03	97.87	94.14	53.15
2021IBAK-2	56718854	53842702	8.08	0.03	97.85	94.08	53.24
2021IBAK-3	55873644	53467430	8.02	0.03	97.87	94.16	53.53
