# Supplementary material for: Combined transcriptome and metabolome analysis provides insights in germination and seedling morphogenesis in aging rice (Oryza sativa L.) seeds treated with indole-3-butyrate
Source: Research Square preprint supplement (doi:10.21203/rs.3.rs-7433438/v1), 2025-09-11
Supplement: Supplementary file 5 [file f4f6c534fafafdd089222847.xlsx]

## Sheet: Sheet1
Table S1. Seedling morphology in seedlings of IBAK - soaked aging rice seeds
Stage	Group	Shoot height (cm)	Root length (cm)	Stem diameter (mm)	Leaf area (mm2)	Shoot fresh weight (mg)	Root fresh weight (mg)	Shoot dry weight (mg)	Root dry weight (mg)	Seedling index	Fresh root-shoot ratio	Dry root-shoot ratio	Seedling fullness
V2	16CK	20.92±0.46 c	15.97±0.77 ab	0.97±0.04 b	104.93±7.60 c	114.85±3.61 b	71.55±5.14 b	17.30±0.83 c	4.39±0.28 b	6.54±0.44 b	0.61±0.03 b	0.25±0.01 b	0.82±0.03 b
	16IBAK	21.92±0.33 b	14.24±0.66 b	0.88±0.03 b	133.18±10.34 ab	115.40±2.89 b	85.85±2.83 a	18.20±0.65 c	5.97±0.22 a	8.95±0.35 a	0.75±0.03 a	0.33±0.01 a	0.83±0.03 b
	21CK	22.93±0.27 a	14.73±0.57 b	1.10±0.04 a	116.94±8.74 bc	122.80±2.83 ab	79.05±3.94 ab	20.10±0.55 b	5.10±0.35 ab	7.70±0.57 ab	0.65±0.04 ab	0.25±0.02 b	0.88±0.02 b
	21IBAK	23.09±0.32 a	17.33±0.86 a	0.99±0.05 ab	148.67±8.86 a	130.10±3.35 a	89.35±5.08 a	22.15±0.52 a	5.97±0.33 a	8.88±0.53 a	0.70±0.04 ab	0.27±0.01 b	0.96±0.02 a
V3	16CK	31.30±0.55 a	16.38±1.00 a	1.09±0.04 b	178.71±9.35 c	203.85±7.86 a	179.55±8.92 b	39.10±1.36 b	20.70±0.91 b	34.12±1.77 b	0.88±0.03 b	0.53±0.02 a	1.26±0.05 b
	16IBAK	29.62±0.75 ab	16.39±0.76 a	1.16±0.03 ab	210.76±12.71 bc	214.00±8.71 a	222.80±10.29 a	44.50±1.69 a	25.52±0.90 a	43.19±1.77 a	1.05±0.04 a	0.58±0.02 a	1.51±0.05 a
	21CK	28.87±0.56 b	16.63±1.16 a	1.17±0.02 ab	232.28±13.83 b	210.15±7.10 a	202.15±8.54 ab	44.00±1.27 a	24.39±0.72 a	40.85±1.39 a	0.96±0.03 ab	0.56±0.01 a	1.53±0.04 a
	21IBAK	29.64±0.88 ab	15.89±1.23 a	1.25±0.05 a	299.56±18.51 a	219.15±11.00 a	223.20±12.67 a	45.45±2.34 a	26.10±1.10 a	44.59±2.11 a	1.03±0.05 a	0.59±0.02 a	1.52±0.05 a
V4	16CK	35.89±0.57 a	16.04±0.47 b	2.78±0.06 b	277.03±14.40 b	319.35±8.23 c	424.20±23.36 b	75.10±2.96 c	31.14±0.89 b	52.89±1.72 b	1.34±0.07 a	0.43±0.02 a	2.11±0.10 b
	16IBAK	36.72±0.62 a	16.71±0.93 ab	2.98±0.09 b	324.97±22.03 b	395.35±18.83 b	474.75±36.08 ab	91.40±4.85 ab	35.71±3.18 ab	62.21±7.06 ab	1.21±0.07 ab	0.40±0.04 a	2.50±0.14 a
	21CK	37.73±0.80 a	19.01±1.05 a	2.81±0.09 b	286.98±19.85 b	404.80±16.81 b	442.70±18.25 b	80.75±3.83 bc	35.37±1.41 ab	60.16±2.60 ab	1.10±0.04 b	0.45±0.02 a	2.14±0.09 b
	21IBAK	36.44±0.71 a	16.86±0.64 ab	3.29±0.13 a	428.37±26.14 a	456.80±25.35 a	541.50±46.98 a	99.45±4.99 a	39.78±3.41 a	70.33±6.55 a	1.20±0.10 ab	0.41±0.03 a	2.72±0.12 a
